# Supplementary material for: How much does it cost to combine supply-side and demand-side RBF approaches in a single intervention? Full cost analysis of the Results Based Financing for Maternal and Newborn Health Initiative in Malawi
Source: PubMed Central journal article supplement — BMJ Open. 2022 Apr 18;12(4):e050885. doi: 10.1136/bmjopen-2021-050885 (PMC9020314; doi:10.1136/bmjopen-2021-050885), 2022-04-18
Supplement: bmjopen-2021-050885supp001.pdf [file bmjopen-2021-050885supp001.pdf]

### Appendix 1 Mapping from micro-level activities to Cost Categories to Main Activities

| Main Activity      | Analysis Cost Categories  | Cost Categories                                | Original description of micro -level activities                                                     |
|--------------------|---------------------------|------------------------------------------------|-----------------------------------------------------------------------------------------------------|
| <b>Demand side</b> | Personnel                 | Personnel                                      |                                                                                                     |
| <b>Demand side</b> | Demand side incentives    | Demand-side incentives                         | Cash Transfers to districts and facilities                                                          |
| <b>Demand side</b> | Capacity building         | Capacity building - management                 | Institutionalisation of the RBF Initiative                                                          |
| <b>Demand side</b> | Demand side incentives    | Demand-side incentives                         | Demand side cash transfers                                                                          |
| <b>Demand side</b> | Capacity building         | Capacity building - management                 | Development of manual for operation, key guidelines                                                 |
| <b>Demand side</b> | General management        | Operations/Administration                      | Operational Costs/Admin - Demands Side Related                                                      |
| <b>Demand side</b> | General management        | General management                             | Print and distribute eligibility cards                                                              |
| <b>Demand side</b> | Capacity building         | Capacity building - management                 | Capacity building (demand side structures and processes)                                            |
| <b>Demand side</b> | Capacity building         | Capacity building - management                 | Capacity building (demand side structures and processes)                                            |
| <b>Demand side</b> | Capacity building         | Capacity building - financial management       | In conjunction with NLGFC train district accountants on RBF financial management and reconciliation |
| <b>Design</b>      | Personnel                 | Personnel                                      |                                                                                                     |
| <b>Design</b>      | Initial Feasibility Study | Initial feasibility study                      | Initial feasibility study                                                                           |
| <b>M&amp;E</b>     | Personnel                 | Personnel RBF                                  |                                                                                                     |
| <b>M&amp;E</b>     | Capacity building         | Capacity building - management                 | Improve quality of data                                                                             |
| <b>M&amp;E</b>     | Baseline assessment       | Baseline assessment                            | Baseline Assessment AND Facility Readiness Assessment                                               |
| <b>M&amp;E</b>     | Capacity building         | Capacity building - Data collection & analysis | Conduct regular data collection and analysis                                                        |
| <b>M&amp;E</b>     | Capacity building         | Capacity building - Data collection & analysis | Train and orient district teams and facilities on the data collection tools and equipment provided  |
| <b>M&amp;E</b>     | Capacity building         | Capacity building - Data collection & analysis | Provide data collection tools and equipment to RBF health facilities                                |

|                   |                           |                                                |                                                                                                    |
|-------------------|---------------------------|------------------------------------------------|----------------------------------------------------------------------------------------------------|
| <b>M&amp;E</b>    | Capacity building         | Capacity building - management                 | Support partnership and collaboration for M&E (capacity building)                                  |
| <b>M&amp;E</b>    | Capacity building         | Capacity building - management                 | Quality Assessment Contributions                                                                   |
| <b>M&amp;E</b>    | Capacity building         | Capacity building - Data collection & analysis | Modify the database                                                                                |
| <b>M&amp;E</b>    | Baseline assessment       | Baseline assessment                            | Conduct Baseline Reassessments<br>SHOULD BE: Baseline Assessment and Facility Readiness Assessment |
| <b>M&amp;E</b>    | Baseline assessment       | Baseline assessment                            | Printing of MoH key guidelines and tools (MNH Guidelines / Internal Supervision Tools)             |
| <b>M&amp;E</b>    | Capacity building         | Capacity building - management                 | Orient district M&E officers on collection tool for missing data                                   |
| <b>M&amp;E</b>    | Baseline assessment       | Baseline assessment                            | Collect baseline data from RBF health facilities                                                   |
| <b>M&amp;E</b>    | Baseline assessment       | Baseline assessment                            | Collect missing baseline data for continuous monitoring                                            |
| <b>Management</b> | Personnel                 | Personnel RBF                                  |                                                                                                    |
| <b>Management</b> | Capacity building         | Capacity building - management                 | Orientation and re-orientation of facility and district staff                                      |
| <b>Management</b> | General management        | General management                             | RBF Coordination                                                                                   |
| <b>Management</b> | Transport & Accommodation | Transport/accommodation                        | International and local travel for foreign personnel                                               |
| <b>Management</b> | Transport & Accommodation | Transport/accommodation                        | Local Transport                                                                                    |
| <b>Management</b> | Office & equipment        | Office and equipment                           | Project Office                                                                                     |
| <b>Management</b> | Transport & Accommodation | Transport/accommodation                        | Allowance and accommodation costs for foreign personnel                                            |
| <b>Management</b> | General management        | General management                             | RBF COORDINATION                                                                                   |
| <b>Management</b> | Office & equipment        | Office and equipment                           | Equipment                                                                                          |
| <b>Management</b> | Office & equipment        | Office and equipment                           | Project Office                                                                                     |
| <b>Management</b> | Transport & Accommodation | Transport/accommodation                        | Local Transport                                                                                    |
| <b>Management</b> | Capacity building         | Governance                                     | Support the creation of a RBF steering committee on MoH level (D 2.2)                              |
| <b>Management</b> | General management        | General management                             | Develop structure of the Initiative                                                                |

|                   |                           |                                          |                                                                                                                      |
|-------------------|---------------------------|------------------------------------------|----------------------------------------------------------------------------------------------------------------------|
| <b>Management</b> | Transport & Accommodation | Transport/accommodation                  | Allowance and accommodation costs for foreign personnel                                                              |
| <b>Management</b> | General management        | General management                       | RBF COORDINATION                                                                                                     |
| <b>Management</b> | Office & equipment        | Office and equipment                     | Office and Equipment                                                                                                 |
| <b>Management</b> | Capacity building         | Fraud mitigation                         | Set up monitoring system for fraud control                                                                           |
| <b>Management</b> | Capacity building         | Capacity building - management           | Briefing District Councils and DHMTs on RBF4MNH Phase II Extension                                                   |
| <b>Management</b> | Capacity building         | General management                       | District Coordination Support                                                                                        |
| <b>Management</b> | Capacity building         | Capacity building - management           | Conduct meetings to increase cooperation with other players like CHAM, Government ministries                         |
| <b>Management</b> | Capacity building         | Capacity building - management           | Consultations with key stakeholders (MoH, MoF, MoLGaRD, NLGFC, ...)                                                  |
| <b>Management</b> | Transport & Accommodation | Transport/accommodation                  | International and local travel for foreign personnel                                                                 |
| <b>Management</b> | Capacity building         | Governance                               | Develop steering processes of the initiative                                                                         |
| <b>Management</b> | Capacity building         | Capacity building - management           | Coordinate with partners and stakeholders                                                                            |
| <b>Management</b> | Capacity building         | Fraud mitigation                         | Set up monitoring systems for fraud control (see S14)<br>SHOULD BE - Set up monitoring system for data fraud control |
| <b>Management</b> | Capacity building         | Fraud mitigation                         | Strengthen monitoring systems for fraud control                                                                      |
| <b>Management</b> | Capacity building         | Capacity building - management           | Provide capacity building and promote innovation for partners of RBF4MNH                                             |
| <b>Management</b> | General management        | General management                       | Link RBF4MMH with other related initiatives                                                                          |
| <b>Management</b> | Capacity building         | Capacity building - management           | Briefing of MoH officials and partners at National level                                                             |
| <b>Management</b> | Capacity building         | Capacity building - financial management | Strengthen RBF disbursement and accounting procedures at health facility level                                       |
| <b>Management</b> | Transport & Accommodation | Transport/accommodation                  | Allowance and accommodation costs for local personnel                                                                |
| <b>Management</b> | Capacity building         | Capacity building - management           | Develop the RBF4MNH Options Office to a centre of excellence                                                         |
| <b>Management</b> | Capacity building         | Capacity building - management           | Briefing MoH top officials (Directors) and CHAM officials                                                            |

|                            |                    |                                          |                                                                                                                                                               |
|----------------------------|--------------------|------------------------------------------|---------------------------------------------------------------------------------------------------------------------------------------------------------------|
| <b>Management</b>          | Audit              | Audit                                    | RBF Audit & external Evaluation                                                                                                                               |
| <b>Management</b>          | Capacity building  | Capacity building - financial management | Establish RBF disbursement and accounting procedures at HF level                                                                                              |
| <b>Management</b>          | Personnel          | Personnel_MoH                            | Director RH unit                                                                                                                                              |
| <b>Management</b>          | Office & equipment | Office and equipment                     | Reports and Documents                                                                                                                                         |
| <b>Management</b>          | Personnel          | Personnel_MoH                            | Senior officer RH unit                                                                                                                                        |
| <b>Management</b>          | Capacity building  | Capacity building - financial management | Discuss and develop expenditure guidelines with HF staff                                                                                                      |
| <b>Management</b>          | Capacity building  | Capacity building - financial management | Establish bank accounts at district and facility level<br>SHOULD BE - Support the establishment and management of bank account at district and facility level |
| <b>Management</b>          | Capacity building  | Capacity building - financial management | Support the establish and management of bank account at district and facility level                                                                           |
| <b>Management</b>          | General management | General management                       | Bank Charges                                                                                                                                                  |
| <b>Management</b>          | General management | Management                               | Overheads MoH                                                                                                                                                 |
| <b>Management</b>          | General management | General management                       | Bank Charges                                                                                                                                                  |
| <b>Management</b>          | Audit              | Audit                                    | -                                                                                                                                                             |
| <b>Management</b>          | Capacity building  | Capacity building - financial management | Strengthen district accounts oversight                                                                                                                        |
| <b>Management</b>          | Capacity building  | General management                       | Support MoH organize technical and steering committee meetings                                                                                                |
| <b>Management</b>          | Capacity building  | Governance                               | Support regular meetings of the RBF steering committee on MoH level (D 2.2)                                                                                   |
| <b>Management</b>          | Capacity building  | General management                       | Support regular meetings of the district RBF steering committee on district level (ME 8.1)                                                                    |
| <b>Management</b>          | General management | General management                       | Miscellaneous (local)                                                                                                                                         |
| <b>Operations research</b> | Personnel          | Consultancy (supportive)                 | Phase I consultancies                                                                                                                                         |
| <b>Operations research</b> | Personnel          | Consultancy (supportive)                 | Phase II consultancies                                                                                                                                        |
| <b>Operations research</b> | Operation research | Operations research                      | Conduct workload analysis in RBF facilities in 2016/17                                                                                                        |

|                            |                    |                          |                                                                                                     |
|----------------------------|--------------------|--------------------------|-----------------------------------------------------------------------------------------------------|
| <b>Operations research</b> | Operation research | Operations research      | Disseminate workload analysis results to stakeholders in the RBF participating districts            |
| <b>Operations research</b> | Operation research | Operations research      | Operational Research                                                                                |
| <b>Operations research</b> | Operation research | Operations research      | utilisation of payments;<br>why women are not delivering at RBF participating HF                    |
| <b>Promotion</b>           | Personnel          |                          |                                                                                                     |
| <b>Promotion</b>           | Awareness campaign | Communications           | Do Awareness Campaign for communities<br>SHOULD BE - Community Awareness Campaigns                  |
| <b>Promotion</b>           | Awareness campaign | Communications           | Develop promotional products                                                                        |
| <b>Promotion</b>           | Awareness campaign | Communications           | Community Awareness Campaigns                                                                       |
| <b>Promotion</b>           | Awareness campaign | Communications           | Develop leaflet (brochure) in English and Chichewa                                                  |
| <b>Promotion</b>           | Awareness campaign | Communications           | Make use of promotional products to market the initiative                                           |
| <b>Promotion</b>           | Awareness campaign | Communications           | Use the launch of the initiative for promotion<br>SHOULD BE: Launch of the initiative for promotion |
| <b>Promotion</b>           | Awareness campaign | Communications           | Make use of promotional products to market the initiative                                           |
| <b>Promotion</b>           | Awareness campaign | Communications           | Develop communication strategy                                                                      |
| <b>Promotion</b>           | Personnel          | Consultancy (supportive) | Consultancy for dissemination workshop                                                              |
| <b>Promotion</b>           | Awareness campaign | Communications           | Develop communication strategy                                                                      |
| <b>Promotion</b>           | Awareness campaign | Communications           | Community Awareness Campaigns                                                                       |
| <b>Promotion</b>           | Awareness campaign | Communications           | Give the initiative a nationally recognised name and logo                                           |
| <b>Promotion</b>           | Awareness campaign | Communications           | Open days to market the initiative at community level (dramatization etc.)                          |
| <b>Promotion</b>           | Awareness campaign | Communications           | Create RBF newsletter                                                                               |

|                    |                           |                                            |                                                                                                                                         |
|--------------------|---------------------------|--------------------------------------------|-----------------------------------------------------------------------------------------------------------------------------------------|
| <b>Promotion</b>   | Awareness campaign        | Communications                             | Advertising                                                                                                                             |
| <b>Promotion</b>   | Awareness campaign        | Communications                             | Roll out the RBF4MNH Communication strategy                                                                                             |
| <b>Supply side</b> | Infrastructure Investment | structural investment - infrastructure     | Provide Infrastructure Investment (IE)                                                                                                  |
| <b>Supply side</b> | Capacity building         | Supply side incentives                     | Supply Side Incentives                                                                                                                  |
| <b>Supply side</b> | Personnel                 |                                            |                                                                                                                                         |
| <b>Supply side</b> | Supply side incentives    | Supply side incentives                     | Supply Side Incentives                                                                                                                  |
| <b>Supply side</b> | Equipment investment      | structural investment - equipment          | Provide Procurement of equipment (IE)                                                                                                   |
| <b>Supply side</b> | Capacity building         | Capacity building - supportive supervision | Provide capacity building and training for staff<br>SHOULD BE - Provide capacity building and training for health workers               |
| <b>Supply side</b> | Infrastructure Investment | structural investment - infrastructure     | Provide Infrastructure Investment (IE)                                                                                                  |
| <b>Supply side</b> | Capacity building         | Investment - Human Resources               | Support DHMTs to ensure health facility staff are well staffed and new staff have orientation towards RBF                               |
| <b>Supply side</b> | Capacity building         | Capacity building - supportive supervision | DHMT Bi-monthly supportive supervision                                                                                                  |
| <b>Supply side</b> | Capacity building         | Capacity building - supportive supervision | Provide Capacity building and training for Health workers                                                                               |
| <b>Supply side</b> | Equipment investment      | structural investment - equipment          | Provide Procurement of equipment (IE)                                                                                                   |
| <b>Supply side</b> | Capacity building         | Capacity building - supportive supervision | Conduct RBF supportive supervision and MNH mentorship                                                                                   |
| <b>Supply side</b> | Capacity building         | Capacity building - management             | Support Facilities & DHMTs<br>SHOULD BE - Support facilities and DHMT in complying to the RBF SOPs and requirements                     |
| <b>Supply side</b> | Capacity building         | General management                         | Ensure sufficient staffing levels in facilities according to MoH guidelines as a precursor to signing Quality and Performance Contracts |
| <b>Supply side</b> | Capacity building         | Quality assurance                          | Establish quality assurance and improvement system                                                                                      |
| <b>Supply side</b> | Capacity building         | Quality assurance                          | Establish quality assurance and improvement system                                                                                      |
| <b>Supply side</b> | Capacity building         | General management                         | Ensure sufficient staffing levels in facilities according to MoH guidelines as a precursor to signing Quality and Performance Contracts |

|                     |                    |                                            |                                                                                                                                         |
|---------------------|--------------------|--------------------------------------------|-----------------------------------------------------------------------------------------------------------------------------------------|
| <b>Supply side</b>  | Capacity building  | Capacity building - management             | Support facilities and DHMT in complying to the RBF SOPs and requirements                                                               |
| <b>Supply side</b>  | Capacity building  | General management                         | Ensure sufficient staffing levels in facilities according to MoH guidelines as a precursor to signing Quality and Performance Contracts |
| <b>Supply side</b>  | Capacity building  | Capacity building - supportive supervision | Make protocols available for 7-9 signal functions                                                                                       |
| <b>Supply side</b>  | Capacity building  | Capacity building - management             | Capacity assessment and re-assessment of new and old facilities                                                                         |
| <b>Supply side</b>  | Capacity building  | Capacity building - supportive supervision | Quarterly Zone supervision                                                                                                              |
| <b>Verification</b> | Verification agent | Supply side verification                   | Identify, contract Verification agent, and conduct verification                                                                         |
| <b>Verification</b> | Verification audit | Internal data audit                        | Internal Data Verification by RBF Team and MoH Team                                                                                     |
| <b>Verification</b> | Verification agent | Supply side verification                   | Identify and contract verification agent                                                                                                |
| <b>Verification</b> | Personnel          |                                            |                                                                                                                                         |
| <b>Verification</b> | Verification audit | Internal data audit                        | Data verification (RBF and MoH team)<br>SHOULD BE - Internal Data Verification by RBF Team and MoH Team                                 |
| <b>Verification</b> | Verification agent | Supply side verification                   | Support to External Data Verification Teams by RBF Team and MoH Team                                                                    |
